# Supplementary material
Source: publisher figshare collection journal article supplement (https://acs.figshare.com/ndownloader/files/28041451)
Supplement: Supplementary file 1 [file 28041451]

# Superconductivity in the Endohedral Ga Cluster Compound PdGa<sub>5</sub>

## Supplementary Material

Zuzanna Ryżyńska<sup>†</sup>, Piotr Wiśniewski<sup>‡</sup>, Dariusz Kaczorowski<sup>‡</sup>, Weiwei Xie<sup>#</sup>, Robert J. Cava<sup>¶</sup>, Tomasz Klimczuk<sup>†</sup>, Michał J. Winiarski<sup>†,\*</sup>

<sup>†</sup> Faculty of Applied Physics and Mathematics and Advanced Materials Center, Gdansk University of Technology, Narutowicza 11/12, 80-232 Gdansk, Poland

<sup>‡</sup> Institute of Low Temperature and Structure Research, Polish Academy of Sciences, Okólna 2, 50-422 Wrocław, Poland

<sup>#</sup> Department of Chemistry and Chemical Biology, Rutgers University, Piscataway, NJ 08854, USA

<sup>¶</sup> Department of Chemistry, Princeton University, Princeton, New Jersey 08544, United States

Table S1 Unit cell parameters and atomic coordinates for the relaxed unit cell of PdGa<sub>5</sub>.

|                          |          |                                                     |          |
|--------------------------|----------|-----------------------------------------------------|----------|
| Space group              |          | <i>I</i> 4/m c m (no. 140)                          |          |
| Unit cell parameters (Å) |          | <i>a</i> = <i>b</i> = 6.38772<br><i>c</i> = 9.92112 |          |
|                          | <i>x</i> | <i>y</i>                                            | <i>z</i> |
| <i>Pd</i>                | 0        | 0                                                   | 1/4      |
| <i>Ga1</i>               | 0        | 0                                                   | 0        |
| <i>Ga2</i>               | 0.35415  | 0.85415                                             | 0.63928  |

Table S2 Unit cell parameters obtained from a LeBail fit to the powder x-ray diffraction pattern collected on a few, finely ground single crystals. The reliability factors given are conventional Rietveld (background corrected) *R*-factors calculated only for points with Bragg contributions.

|                          |  |                                                                                                                        |  |
|--------------------------|--|------------------------------------------------------------------------------------------------------------------------|--|
| Space group              |  | <i>I</i> 4/m c m (no. 140)                                                                                             |  |
| Unit cell parameters (Å) |  | <i>a</i> = <i>b</i> = 6.4350(1)<br><i>c</i> = 9.9866(2)                                                                |  |
| Reliability factors:     |  | <i>R</i> <sub>p</sub> = 12.0%<br><i>R</i> <sub>wp</sub> = 15.6%<br><i>R</i> <sub>exp</sub> = 11.45%<br>$\chi^2$ = 1.87 |  |
